# Supplementary material for: On the evolution of the quality of macromolecular models in the PDB
Source: PubMed Central journal article supplement (PMC7340579; doi:10.1111/febs.15314), 2020-04-20
Supplement: NIHMS1589531-supplement-sup_info.pdf [file NIHMS1589531-supplement-sup_info.pdf]

## **On the evolution of the quality of macromolecular models in the PDB**

Dariusz Brzezinski, Zbigniew Dauter, Wlodek Minor and Mariusz Jaskolski

DOI: 10.1111/febs.15314

# On the evolution of the quality of macromolecular models in the PDB

## Supplementary Materials

Dariusz Brzezinski<sup>1,2,3,4</sup>, Zbigniew Dauter<sup>5</sup>, Wladek Minor<sup>4</sup> and Mariusz Jaskolski<sup>1,6\*</sup>

<sup>1</sup>Center for Biocrystallographic Research, Institute of Bioorganic Chemistry, Polish Academy of Sciences, Poznan, 61-704, Poland; <sup>2</sup>Institute of Computing Science, Poznan University of Technology, Poznan, 60-965, Poland; <sup>3</sup>Center for Artificial Intelligence and Machine Learning, Poznan University of Technology, Poznan, 60-965, Poland; <sup>4</sup>Department of Molecular Physiology and Biological Physics, University of Virginia, Charlottesville, USA; <sup>5</sup>Synchrotron Radiation Research Section, Macromolecular Crystallography Laboratory, National Cancer Institute, Argonne National Laboratory, Argonne, USA; <sup>6</sup>Department of Crystallography, Faculty of Chemistry, A. Mickiewicz University, Poznan, 61-614, Poland;

\*Correspondence e-mail: [mariuszj@amu.edu.pl](mailto:mariuszj@amu.edu.pl)

**Table S1. All-time journal ranking according to  $P_{QI}(t)$ .** The ranking includes all the journals that had at least 100 primary citations of structures in the PDB.  $P_{QI}(t)$  higher than 50% means that the structures published in a given journal were, on average, better than 50% of structures present in the PDB at the time of deposition (in this case regardless of resolution). Journals with more than 1000 structures are highlighted in gray.

\* Denotes journals that have average  $P_{QI}(t)$  significantly different than the expected value in the population, according to Welch's t-test with Bonferroni correction at the significance level  $\alpha=0.001$ . Mean denotes the arithmetic mean, G-mean denotes the geometric mean (log-average), V-mean denotes the mean in  $\text{\AA}^{-1/3}$ .

| Rank | Journal                      | Mean<br>$P_{QI}(t)$<br>[%] | Mean<br>resolution<br>[ $\text{\AA}$ ] | G-mean<br>resolution<br>[ $\text{\AA}$ ] | V-mean<br>resolution<br>[ $\text{\AA}$ ] | Structure<br>count |
|------|------------------------------|----------------------------|----------------------------------------|------------------------------------------|------------------------------------------|--------------------|
| 1    | TUBERCULOSIS (EDINB)*        | 84.81                      | 2.02                                   | 2.00                                     | 1.92                                     | 132                |
| 2    | CHEMISTRY*                   | 72.34                      | 1.82                                   | 1.77                                     | 1.62                                     | 242                |
| 3    | CHEM COMMUN*                 | 71.88                      | 1.81                                   | 1.75                                     | 1.59                                     | 280                |
| 4    | CHEMBIOCHEM*                 | 71.84                      | 1.92                                   | 1.87                                     | 1.71                                     | 527                |
| 5    | ACS INFECT DIS*              | 71.69                      | 1.95                                   | 1.90                                     | 1.78                                     | 153                |
| 6    | EUR J MED CHEM*              | 71.39                      | 2.03                                   | 1.97                                     | 1.81                                     | 418                |
| 7    | ACS CATAL*                   | 71.33                      | 1.94                                   | 1.88                                     | 1.70                                     | 241                |
| 8    | ORG BIOMOL CHEM*             | 71.22                      | 1.88                                   | 1.82                                     | 1.64                                     | 167                |
| 9    | J INORG BIOCHEM*             | 71.11                      | 1.78                                   | 1.73                                     | 1.57                                     | 171                |
| 10   | IUCRJ*                       | 70.62                      | 1.95                                   | 1.88                                     | 1.69                                     | 281                |
| 11   | J SYNCHROTRON RADIAT*        | 70.24                      | 1.79                                   | 1.73                                     | 1.56                                     | 147                |
| 12   | ACS OMEGA*                   | 69.77                      | 1.81                                   | 1.77                                     | 1.64                                     | 102                |
| 13   | J BIOL INORG CHEM*           | 68.05                      | 1.88                                   | 1.82                                     | 1.64                                     | 265                |
| 14   | CHEM SCI*                    | 67.78                      | 1.87                                   | 1.83                                     | 1.68                                     | 268                |
| 15   | J COMPUT AIDED MOL DES       | 67.57                      | 1.88                                   | 1.86                                     | 1.77                                     | 115                |
| 16   | ANGEW CHEM*                  | 67.45                      | 1.92                                   | 1.85                                     | 1.65                                     | 1,065              |
| 17   | NAT CHEM*                    | 67.45                      | 1.95                                   | 1.85                                     | 1.64                                     | 173                |
| 18   | FEBS J*                      | 66.24                      | 2.02                                   | 1.97                                     | 1.81                                     | 1,539              |
| 19   | APPL ENVIRON MICROBIOL       | 66.00                      | 2.01                                   | 1.96                                     | 1.83                                     | 112                |
| 20   | ANTIMICROB AGENTS CHEMOTHER* | 65.64                      | 1.96                                   | 1.88                                     | 1.65                                     | 309                |
| 21   | ARCH BIOCHEM BIOPHYS*        | 65.33                      | 2.08                                   | 2.03                                     | 1.89                                     | 276                |
| 22   | GLYCOBIOLOGY                 | 65.13                      | 1.96                                   | 1.90                                     | 1.74                                     | 188                |
| 23   | ACS CHEM BIOL*               | 64.70                      | 2.04                                   | 1.98                                     | 1.83                                     | 1,104              |

|    |                            |       |      |      |      |        |
|----|----------------------------|-------|------|------|------|--------|
| 24 | CHEMMEDCHEM*               | 64.65 | 1.94 | 1.88 | 1.69 | 556    |
| 25 | BIOCHEM J*                 | 64.32 | 2.11 | 2.06 | 1.89 | 1,033  |
| 26 | INT J MOL SCI              | 63.83 | 2.12 | 2.04 | 1.81 | 103    |
| 27 | ACTA CRYST F*              | 63.71 | 2.09 | 2.02 | 1.81 | 1,466  |
| 28 | ACTA CRYST D*              | 63.61 | 1.99 | 1.91 | 1.70 | 4,952  |
| 29 | J AM CHEM SOC*             | 63.37 | 2.00 | 1.93 | 1.74 | 2,369  |
| 30 | PROTEIN ENG DES SEL        | 63.05 | 2.05 | 2.00 | 1.84 | 294    |
| 31 | TO BE PUBLISHED*           | 62.75 | 2.03 | 1.98 | 1.81 | 22,421 |
| 32 | BIOPHYS J                  | 62.49 | 1.92 | 1.85 | 1.66 | 199    |
| 33 | MBIO                       | 62.04 | 2.24 | 2.15 | 1.91 | 169    |
| 34 | SCI REP*                   | 61.27 | 2.16 | 2.09 | 1.88 | 1,847  |
| 35 | NAT CHEM BIOL              | 61.12 | 2.19 | 2.12 | 1.92 | 1,013  |
| 36 | FEBS LETT                  | 61.10 | 2.10 | 2.04 | 1.85 | 814    |
| 37 | BIOCHEMISTRY*              | 60.68 | 2.05 | 2.00 | 1.84 | 8,896  |
| 38 | PLOS PATHOG                | 60.66 | 2.25 | 2.17 | 1.96 | 656    |
| 39 | CELL CHEM BIOL             | 60.51 | 2.08 | 2.03 | 1.88 | 902    |
| 40 | J BIOCHEM                  | 60.30 | 2.05 | 2.01 | 1.88 | 279    |
| 41 | PLOS ONE                   | 60.05 | 2.15 | 2.09 | 1.92 | 2,057  |
| 42 | NAT COMMUN*                | 60.04 | 2.21 | 2.11 | 1.86 | 3,538  |
| 43 | FASEB J                    | 60.01 | 2.03 | 1.98 | 1.86 | 161    |
| 44 | BMC STRUCT BIOL            | 59.69 | 2.08 | 2.02 | 1.84 | 228    |
| 45 | BIOCHIMIE                  | 59.58 | 2.07 | 2.02 | 1.81 | 128    |
| 46 | PROTEIN SCI                | 59.57 | 2.07 | 2.02 | 1.85 | 2,235  |
| 47 | ACS MED CHEM LETT          | 59.41 | 2.12 | 2.06 | 1.88 | 1,062  |
| 48 | J MED CHEM                 | 58.68 | 2.07 | 2.02 | 1.86 | 5,525  |
| 49 | BIOCHIM BIOPHYS ACTA       | 58.15 | 2.09 | 2.04 | 1.87 | 600    |
| 50 | PROTEINS                   | 57.97 | 2.07 | 2.01 | 1.84 | 1,999  |
| 51 | BIOORG MED CHEM            | 57.87 | 2.10 | 2.04 | 1.88 | 659    |
| 52 | MOL MICROBIOL              | 57.66 | 2.16 | 2.09 | 1.87 | 412    |
| 53 | J BIOL CHEM                | 57.41 | 2.12 | 2.06 | 1.89 | 11,055 |
| 54 | NAT MICROBIOL              | 56.88 | 2.32 | 2.25 | 2.04 | 111    |
| 55 | J STRUCT BIOL              | 56.58 | 2.15 | 2.08 | 1.90 | 1,038  |
| 56 | INT J BIOL MACROMOL        | 56.48 | 2.05 | 2.00 | 1.80 | 168    |
| 57 | J STRUCT FUNCT GENOM       | 55.69 | 2.07 | 2.03 | 1.92 | 168    |
| 58 | STRUCTURE*                 | 55.54 | 2.20 | 2.11 | 1.86 | 5,348  |
| 59 | J MOL BIOL*                | 55.23 | 2.13 | 2.06 | 1.88 | 9,507  |
| 60 | VIROLOGY                   | 54.62 | 2.44 | 2.37 | 2.18 | 126    |
| 61 | BIOCHEM BIOPHYS RES COMMUN | 54.29 | 2.18 | 2.11 | 1.92 | 976    |
| 62 | MABS                       | 54.14 | 2.35 | 2.29 | 2.14 | 115    |
| 63 | PLANT CELL                 | 53.65 | 2.21 | 2.17 | 2.05 | 138    |
| 64 | J BACTERIOL                | 53.63 | 2.22 | 2.16 | 2.01 | 371    |
| 65 | NUCLEIC ACIDS RES*         | 53.31 | 2.28 | 2.21 | 1.98 | 2,127  |
| 66 | CELL HOST MICROBE          | 53.10 | 2.50 | 2.43 | 2.20 | 107    |
| 67 | J VIROL*                   | 52.22 | 2.34 | 2.26 | 2.06 | 957    |
| 68 | PNAS*                      | 52.17 | 2.27 | 2.19 | 1.94 | 7,376  |
| 69 | SCI ADV                    | 51.69 | 2.33 | 2.22 | 1.85 | 182    |
| 70 | MOL PHARMACOL              | 51.48 | 2.35 | 2.27 | 2.02 | 129    |
| 71 | RNA                        | 51.48 | 2.44 | 2.32 | 1.97 | 245    |
| 72 | PLOS BIOL                  | 51.12 | 2.35 | 2.25 | 2.01 | 336    |
| 73 | J EXP MED                  | 50.54 | 2.34 | 2.28 | 2.08 | 121    |
| 74 | ELIFE*                     | 49.25 | 2.41 | 2.30 | 2.03 | 869    |
| 75 | J IMMUNOL*                 | 49.01 | 2.26 | 2.19 | 2.02 | 296    |
| 76 | PROTEIN CELL               | 48.77 | 2.26 | 2.21 | 2.04 | 178    |
| 77 | BIOORG MED CHEM LETT*      | 47.44 | 2.19 | 2.16 | 2.05 | 1,590  |
| 78 | EMBO REP*                  | 47.25 | 2.35 | 2.28 | 2.09 | 211    |
| 79 | CELL REP*                  | 46.89 | 2.52 | 2.42 | 2.16 | 399    |
| 80 | GENES DEV*                 | 46.62 | 2.41 | 2.33 | 2.11 | 279    |
| 81 | CELL RES*                  | 45.36 | 2.42 | 2.36 | 2.20 | 189    |
| 82 | SCIENCE*                   | 44.98 | 2.50 | 2.39 | 2.10 | 1,949  |
| 83 | NATURE*                    | 44.77 | 2.52 | 2.42 | 2.12 | 3,060  |
| 84 | NEURON*                    | 44.65 | 2.63 | 2.41 | 2.08 | 149    |
| 85 | NAT STRUCT MOL BIOL*       | 44.10 | 2.40 | 2.31 | 2.07 | 2,915  |
| 86 | COMMUN BIOL*               | 43.81 | 2.39 | 2.31 | 2.00 | 104    |
| 87 | EMBO J*                    | 43.63 | 2.37 | 2.30 | 2.10 | 1,910  |
| 88 | IMMUNITY*                  | 43.18 | 2.44 | 2.37 | 2.18 | 265    |
| 89 | MOL CELL*                  | 42.69 | 2.45 | 2.37 | 2.14 | 1,599  |
| 90 | NAT IMMUNOL*               | 42.15 | 2.52 | 2.45 | 2.22 | 119    |
| 91 | CELL*                      | 40.07 | 2.54 | 2.45 | 2.20 | 1,563  |

**Table S2. All-time journal ranking according to  $P_{Q1min}(t,d)$ .** The ranking includes all the journals that had at least 100 primary citations of structures in the PDB.  $P_{Q1min}(t,d)$  higher than 50% means that the structures published in a given journal were, on average, better than 50% of structures present in the PDB at the time of deposition. Journals with more than 1000 structures are highlighted in gray.

\* Denotes journals that have average  $P_{Q1min}(t,d)$  significantly different than the expected value in the population, according to Welch's t-test with Bonferroni correction at the significance level  $\alpha=0.001$ . Mean denotes the arithmetic mean, G-mean denotes the geometric mean (log-average), V-mean denotes the mean in  $\text{\AA}^{-1/3}$ .

| Rank | Journal                     | Mean<br>$P_{Q1min}(t,d)$<br>[%] | Mean<br>resolution<br>[ $\text{\AA}$ ] | G-mean<br>resolution<br>[ $\text{\AA}$ ] | V-mean<br>resolution<br>[ $\text{\AA}$ ] | Structure<br>count |
|------|-----------------------------|---------------------------------|----------------------------------------|------------------------------------------|------------------------------------------|--------------------|
| 1    | TUBERCULOSIS (EDINB)*       | 82.20                           | 2.02                                   | 2.00                                     | 1.92                                     | 132                |
| 2    | CELL HOST MICROBE           | 67.84                           | 2.50                                   | 2.43                                     | 2.20                                     | 107                |
| 3    | EUR J MED CHEM*             | 67.32                           | 2.03                                   | 1.97                                     | 1.81                                     | 418                |
| 4    | ACS CATAL*                  | 67.12                           | 1.94                                   | 1.88                                     | 1.70                                     | 241                |
| 5    | ORG BIOMOL CHEM             | 66.21                           | 1.88                                   | 1.82                                     | 1.64                                     | 167                |
| 6    | CHEMBIOCHEM*                | 66.02                           | 1.92                                   | 1.87                                     | 1.71                                     | 527                |
| 7    | ACS INFECT DIS              | 64.24                           | 1.95                                   | 1.90                                     | 1.78                                     | 153                |
| 8    | ARCH BIOCHEM BIOPHYS        | 64.14                           | 2.08                                   | 2.03                                     | 1.89                                     | 276                |
| 9    | CHEM COMMUN                 | 63.92                           | 1.81                                   | 1.75                                     | 1.59                                     | 280                |
| 10   | MBIO                        | 63.76                           | 2.24                                   | 2.15                                     | 1.91                                     | 169                |
| 11   | IUCRJ                       | 63.72                           | 1.95                                   | 1.88                                     | 1.69                                     | 281                |
| 12   | BIOCHEM J*                  | 63.32                           | 2.11                                   | 2.06                                     | 1.89                                     | 1,033              |
| 13   | INT J MOL SCI               | 63.24                           | 2.12                                   | 2.04                                     | 1.81                                     | 103                |
| 14   | J BIOL INORG CHEM           | 63.12                           | 1.88                                   | 1.82                                     | 1.64                                     | 265                |
| 15   | PLOS PATHOG*                | 62.66                           | 2.25                                   | 2.17                                     | 1.96                                     | 656                |
| 16   | NAT CHEM BIOL*              | 62.30                           | 2.19                                   | 2.12                                     | 1.92                                     | 1,013              |
| 17   | FEBS J*                     | 62.28                           | 2.02                                   | 1.97                                     | 1.81                                     | 1,539              |
| 18   | APPL ENVIRON MICROBIOL      | 62.13                           | 2.01                                   | 1.96                                     | 1.83                                     | 112                |
| 19   | RNA                         | 61.14                           | 2.44                                   | 2.32                                     | 1.97                                     | 245                |
| 20   | ACTA CRYST F*               | 61.10                           | 2.09                                   | 2.02                                     | 1.81                                     | 1,466              |
| 21   | NAT MICROBIOL               | 60.95                           | 2.32                                   | 2.25                                     | 2.04                                     | 111                |
| 22   | CHEMISTRY                   | 60.79                           | 1.82                                   | 1.77                                     | 1.62                                     | 242                |
| 23   | SCI REP*                    | 60.75                           | 2.16                                   | 2.09                                     | 1.88                                     | 1,847              |
| 24   | ANGEW CHEM                  | 60.28                           | 1.92                                   | 1.85                                     | 1.64                                     | 1,065              |
| 25   | J EXP MED                   | 60.22                           | 2.34                                   | 2.28                                     | 2.08                                     | 121                |
| 26   | BIOCHIMIE                   | 60.15                           | 2.07                                   | 2.02                                     | 1.81                                     | 128                |
| 27   | MOL PHARMACOL               | 60.03                           | 2.35                                   | 2.27                                     | 2.02                                     | 129                |
| 28   | J SYNCHROTRON RADIAT        | 59.89                           | 1.79                                   | 1.73                                     | 1.56                                     | 147                |
| 29   | J INORG BIOCHEM             | 59.58                           | 1.78                                   | 1.73                                     | 1.57                                     | 171                |
| 30   | ANTIMICROB AGENTS CHEMOTHER | 59.38                           | 1.96                                   | 1.88                                     | 1.65                                     | 309                |
| 31   | NAT COMMUN*                 | 59.36                           | 2.21                                   | 2.11                                     | 1.86                                     | 3,538              |
| 32   | FEBS LETT                   | 59.34                           | 2.10                                   | 2.04                                     | 1.85                                     | 814                |
| 33   | ACS CHEM BIOL               | 59.29                           | 2.04                                   | 1.98                                     | 1.83                                     | 1,104              |
| 34   | PLOS ONE                    | 59.25                           | 2.15                                   | 2.09                                     | 1.92                                     | 2,057              |
| 35   | PROTEIN ENG DES SEL         | 59.00                           | 2.05                                   | 2.00                                     | 1.84                                     | 294                |
| 36   | GLYCOBIOLOGY                | 58.97                           | 1.96                                   | 1.90                                     | 1.74                                     | 188                |
| 37   | J VIROL                     | 58.63                           | 2.34                                   | 2.26                                     | 2.06                                     | 957                |
| 38   | CELL CHEM BIOL              | 58.61                           | 2.08                                   | 2.03                                     | 1.88                                     | 902                |
| 39   | MABS                        | 58.48                           | 2.35                                   | 2.29                                     | 2.14                                     | 115                |
| 40   | J AM CHEM SOC               | 58.36                           | 2.00                                   | 1.93                                     | 1.74                                     | 2,369              |
| 41   | NAT CHEM                    | 58.34                           | 1.95                                   | 1.85                                     | 1.65                                     | 173                |
| 42   | STRUCTURE                   | 58.27                           | 2.20                                   | 2.11                                     | 1.86                                     | 5,348              |
| 43   | BIOCHEMISTRY                | 58.26                           | 2.05                                   | 2.00                                     | 1.84                                     | 8,896              |
| 44   | VIROLOGY                    | 58.08                           | 2.44                                   | 2.37                                     | 2.18                                     | 126                |
| 45   | CELL REP                    | 58.02                           | 2.52                                   | 2.42                                     | 2.16                                     | 399                |
| 46   | <b>TO BE PUBLISHED</b>      | 57.99                           | 2.03                                   | 1.98                                     | 1.81                                     | 22,421             |
| 47   | PLANT CELL                  | 57.97                           | 2.21                                   | 2.17                                     | 2.05                                     | 138                |
| 48   | FASEB J                     | 57.71                           | 2.03                                   | 1.98                                     | 1.86                                     | 161                |
| 49   | ACTA CRYST D                | 57.66                           | 1.99                                   | 1.91                                     | 1.70                                     | 4,952              |
| 50   | MOL MICROBIOL               | 57.64                           | 2.16                                   | 2.09                                     | 1.87                                     | 412                |
| 51   | ACS MED CHEM LETT           | 57.39                           | 2.12                                   | 2.06                                     | 1.88                                     | 1,062              |
| 52   | BMC STRUCT BIOL             | 57.30                           | 2.08                                   | 2.02                                     | 1.84                                     | 228                |
| 53   | J COMPUT AIDED MOL DES      | 56.93                           | 1.88                                   | 1.86                                     | 1.77                                     | 115                |
| 54   | NUCLEIC ACIDS RES           | 56.81                           | 2.28                                   | 2.21                                     | 1.98                                     | 2,127              |
| 55   | CHEMMEDCHEM                 | 56.77                           | 1.94                                   | 1.88                                     | 1.69                                     | 556                |
| 56   | ACS OMEGA                   | 56.65                           | 1.81                                   | 1.77                                     | 1.64                                     | 102                |
| 57   | BIOCHIM BIOPHYS ACTA        | 56.63                           | 2.09                                   | 2.04                                     | 1.87                                     | 600                |
| 58   | PROTEIN SCI                 | 56.54                           | 2.07                                   | 2.02                                     | 1.85                                     | 2,235              |
| 59   | J BIOL CHEM                 | 56.37                           | 2.12                                   | 2.06                                     | 1.89                                     | 11,055             |
| 60   | J MED CHEM                  | 56.18                           | 2.07                                   | 2.02                                     | 1.86                                     | 5,525              |
| 61   | J BIOCHEM                   | 56.06                           | 2.05                                   | 2.01                                     | 1.88                                     | 279                |

|    |                            |       |      |      |      |       |
|----|----------------------------|-------|------|------|------|-------|
| 62 | PROTEINS                   | 55.96 | 2.07 | 2.01 | 1.84 | 1,999 |
| 63 | NATURE                     | 55.78 | 2.52 | 2.42 | 2.12 | 3,060 |
| 64 | CELL RES                   | 55.67 | 2.42 | 2.36 | 2.20 | 189   |
| 65 | J BACTERIOL                | 55.64 | 2.22 | 2.16 | 2.01 | 371   |
| 66 | BIOCHEM BIOPHYS RES COMMUN | 55.52 | 2.18 | 2.11 | 1.92 | 976   |
| 67 | NAT IMMUNOL                | 55.46 | 2.52 | 2.45 | 2.22 | 119   |
| 68 | J MOL BIOL*                | 55.21 | 2.13 | 2.06 | 1.88 | 9,507 |
| 69 | PNAS*                      | 55.10 | 2.27 | 2.19 | 1.94 | 7,376 |
| 70 | J STRUCT BIOL              | 55.09 | 2.15 | 2.08 | 1.90 | 1,038 |
| 71 | CHEM SCI                   | 55.02 | 1.87 | 1.83 | 1.68 | 268   |
| 72 | BIOORG MED CHEM            | 54.85 | 2.10 | 2.04 | 1.88 | 659   |
| 73 | PLOS BIOL                  | 54.37 | 2.35 | 2.25 | 2.01 | 336   |
| 74 | SCI ADV                    | 54.34 | 2.33 | 2.22 | 1.85 | 182   |
| 75 | PROTEIN CELL               | 54.17 | 2.26 | 2.21 | 2.04 | 178   |
| 76 | J IMMUNOL                  | 54.06 | 2.26 | 2.19 | 2.02 | 296   |
| 77 | COMMUN BIOL                | 54.02 | 2.39 | 2.31 | 2.00 | 104   |
| 78 | GENES DEV                  | 53.88 | 2.41 | 2.33 | 2.11 | 279   |
| 79 | ELIFE                      | 53.83 | 2.41 | 2.30 | 2.03 | 869   |
| 80 | SCIENCE*                   | 53.67 | 2.50 | 2.39 | 2.10 | 1,949 |
| 81 | IMMUNITY                   | 53.20 | 2.44 | 2.37 | 2.18 | 265   |
| 82 | EMBO REP                   | 53.11 | 2.35 | 2.28 | 2.09 | 211   |
| 83 | NEURON                     | 52.38 | 2.63 | 2.41 | 2.08 | 149   |
| 84 | NAT STRUCT MOL BIOL*       | 52.33 | 2.40 | 2.31 | 2.07 | 2,915 |
| 85 | INT J BIOL MACROMOL        | 52.32 | 2.05 | 2.00 | 1.80 | 168   |
| 86 | EMBO J*                    | 52.20 | 2.37 | 2.30 | 2.10 | 1,910 |
| 87 | MOL CELL*                  | 51.94 | 2.45 | 2.37 | 2.14 | 1,599 |
| 88 | CELL*                      | 51.90 | 2.54 | 2.45 | 2.20 | 1,563 |
| 89 | BIOPHYS J                  | 50.44 | 1.92 | 1.85 | 1.66 | 199   |
| 90 | BIOORG MED CHEM LETT*      | 50.01 | 2.19 | 2.16 | 2.05 | 1,590 |
| 91 | J STRUCT FUNCT GENOM       | 49.35 | 2.07 | 2.03 | 1.92 | 168   |

**Table S3. All-time journal ranking according to  $P_{QImin}(t)$ .** The ranking includes all the journals that had at least 100 primary citations of structures in the PDB.  $P_{QImin}(t)$  higher than 50% means that the structures published in a given journal were, on average, better than 50% of structures present in the PDB at the time of deposition (in this case regardless of resolution). Journals with more than 1000 structures are highlighted in gray.

\* Denotes journals that have average  $P_{QImin}(t)$  significantly different than the expected value in the population, according to Welch's t-test with Bonferroni correction at the significance level  $\alpha=0.001$ . Mean denotes the arithmetic mean, G-mean denotes the geometric mean (log-average), V-mean denotes the mean in  $\text{\AA}^{-1/3}$ .

| Rank | Journal                     | Mean<br>$P_{QImin}(t)$<br>[%] | Mean<br>resolution<br>[ $\text{\AA}$ ] | G-mean<br>resolution<br>[ $\text{\AA}$ ] | V-mean<br>resolution<br>[ $\text{\AA}$ ] | Structure<br>count |
|------|-----------------------------|-------------------------------|----------------------------------------|------------------------------------------|------------------------------------------|--------------------|
| 1    | TUBERCULOSIS (EDINB)*       | 81.93                         | 2.02                                   | 2.00                                     | 1.92                                     | 132                |
| 2    | ORG BIOMOL CHEM*            | 70.36                         | 1.88                                   | 1.82                                     | 1.64                                     | 167                |
| 3    | CHEM COMMUN*                | 70.06                         | 1.81                                   | 1.75                                     | 1.59                                     | 280                |
| 4    | CHEMBIOCHEM*                | 69.79                         | 1.92                                   | 1.87                                     | 1.71                                     | 527                |
| 5    | ACS CATAL*                  | 69.56                         | 1.94                                   | 1.88                                     | 1.70                                     | 241                |
| 6    | EUR J MED CHEM*             | 68.11                         | 2.03                                   | 1.97                                     | 1.81                                     | 418                |
| 7    | ACS INFECT DIS*             | 67.92                         | 1.95                                   | 1.90                                     | 1.78                                     | 153                |
| 8    | J INORG BIOCHEM*            | 67.67                         | 1.78                                   | 1.73                                     | 1.57                                     | 171                |
| 9    | J BIOL INORG CHEM*          | 67.23                         | 1.88                                   | 1.82                                     | 1.64                                     | 265                |
| 10   | CHEMISTRY*                  | 67.10                         | 1.82                                   | 1.77                                     | 1.62                                     | 242                |
| 11   | J SYNCHROTRON RADIAT*       | 66.90                         | 1.79                                   | 1.73                                     | 1.56                                     | 147                |
| 12   | IUCRJ*                      | 66.32                         | 1.95                                   | 1.88                                     | 1.69                                     | 281                |
| 13   | APPL ENVIRON MICROBIOL      | 64.87                         | 2.01                                   | 1.96                                     | 1.83                                     | 112                |
| 14   | ANGEW CHEM*                 | 64.12                         | 1.92                                   | 1.85                                     | 1.64                                     | 1,065              |
| 15   | J COMPUT AIDED MOL DES      | 64.01                         | 1.88                                   | 1.86                                     | 1.77                                     | 115                |
| 16   | ARCH BIOCHEM BIOPHYS*       | 63.73                         | 2.08                                   | 2.03                                     | 1.89                                     | 276                |
| 17   | ACS OMEGA                   | 63.52                         | 1.81                                   | 1.77                                     | 1.64                                     | 102                |
| 18   | FEBS J*                     | 63.40                         | 2.02                                   | 1.97                                     | 1.81                                     | 1,539              |
| 19   | NAT CHEM                    | 62.95                         | 1.95                                   | 1.85                                     | 1.65                                     | 173                |
| 20   | ANTIMICROB AGENTS CHEMOTHER | 62.47                         | 1.96                                   | 1.88                                     | 1.65                                     | 309                |
| 21   | BIOCHEM J*                  | 62.19                         | 2.11                                   | 2.06                                     | 1.89                                     | 1,033              |
| 22   | PROTEIN ENG DES SEL         | 60.94                         | 2.05                                   | 2.00                                     | 1.84                                     | 294                |
| 23   | ACTA CRYST F*               | 60.83                         | 2.09                                   | 2.02                                     | 1.81                                     | 1,466              |
| 24   | GLYCOBIOLOGY                | 60.66                         | 1.96                                   | 1.90                                     | 1.74                                     | 188                |
| 25   | BIOCHIMIE                   | 60.51                         | 2.07                                   | 2.02                                     | 1.81                                     | 128                |
| 26   | J AM CHEM SOC*              | 60.39                         | 2.00                                   | 1.93                                     | 1.74                                     | 2,369              |
| 27   | ACS CHEM BIOL*              | 60.35                         | 2.04                                   | 1.98                                     | 1.83                                     | 1,104              |
| 28   | CHEM SCI                    | 60.20                         | 1.87                                   | 1.83                                     | 1.68                                     | 268                |
| 29   | ACTA CRYST D*               | 60.15                         | 1.99                                   | 1.91                                     | 1.70                                     | 4,952              |
| 30   | INT J MOL SCI               | 60.13                         | 2.12                                   | 2.04                                     | 1.81                                     | 103                |
| 31   | BIOCHEMISTRY*               | 59.55                         | 2.05                                   | 2.00                                     | 1.84                                     | 8,896              |
| 32   | CELL CHEM BIOL              | 59.40                         | 2.08                                   | 2.03                                     | 1.88                                     | 902                |
| 33   | FASEB J                     | 59.35                         | 2.03                                   | 1.98                                     | 1.86                                     | 161                |
| 34   | <b>TO BE PUBLISHED*</b>     | 59.33                         | 2.03                                   | 1.98                                     | 1.81                                     | 22,421             |
| 35   | NAT CHEM BIOL               | 59.26                         | 2.19                                   | 2.12                                     | 1.92                                     | 1,013              |
| 36   | FEBS LETT                   | 59.04                         | 2.10                                   | 2.04                                     | 1.85                                     | 814                |
| 37   | CHEMMEDCHEM                 | 58.95                         | 1.94                                   | 1.88                                     | 1.69                                     | 556                |
| 38   | SCI REP                     | 58.49                         | 2.16                                   | 2.09                                     | 1.88                                     | 1,847              |
| 39   | MBIO                        | 58.47                         | 2.24                                   | 2.15                                     | 1.91                                     | 169                |
| 40   | PLOS PATHOG                 | 57.78                         | 2.25                                   | 2.17                                     | 1.96                                     | 656                |
| 41   | PLOS ONE                    | 57.63                         | 2.15                                   | 2.09                                     | 1.92                                     | 2,057              |
| 42   | J BIOCHEM                   | 57.56                         | 2.05                                   | 2.01                                     | 1.88                                     | 279                |
| 43   | PROTEIN SCI                 | 57.42                         | 2.07                                   | 2.02                                     | 1.85                                     | 2,235              |
| 44   | BMC STRUCT BIOL             | 57.34                         | 2.08                                   | 2.02                                     | 1.84                                     | 228                |
| 45   | PROTEINS                    | 57.07                         | 2.07                                   | 2.01                                     | 1.84                                     | 1,999              |
| 46   | J MED CHEM                  | 56.70                         | 2.07                                   | 2.02                                     | 1.86                                     | 5,525              |
| 47   | BIOPHYS J                   | 56.68                         | 1.92                                   | 1.85                                     | 1.66                                     | 199                |
| 48   | NAT COMMUN                  | 56.45                         | 2.21                                   | 2.11                                     | 1.86                                     | 3,538              |
| 49   | BIOCHIM BIOPHYS ACTA        | 56.31                         | 2.09                                   | 2.04                                     | 1.87                                     | 600                |
| 50   | ACS MED CHEM LETT           | 56.01                         | 2.12                                   | 2.06                                     | 1.88                                     | 1,062              |
| 51   | J BIOL CHEM                 | 55.60                         | 2.12                                   | 2.06                                     | 1.89                                     | 11,055             |
| 52   | MOL MICROBIOL               | 55.38                         | 2.16                                   | 2.09                                     | 1.87                                     | 412                |
| 53   | INT J BIOL MACROMOL         | 55.06                         | 2.05                                   | 2.00                                     | 1.80                                     | 168                |
| 54   | CELL HOST MICROBE           | 54.93                         | 2.50                                   | 2.43                                     | 2.20                                     | 107                |
| 55   | BIOORG MED CHEM             | 54.79                         | 2.10                                   | 2.04                                     | 1.88                                     | 659                |
| 56   | J MOL BIOL                  | 54.52                         | 2.13                                   | 2.06                                     | 1.88                                     | 9,507              |
| 57   | NAT MICROBIOL               | 54.48                         | 2.32                                   | 2.25                                     | 2.04                                     | 111                |
| 58   | STRUCTURE                   | 54.37                         | 2.20                                   | 2.11                                     | 1.86                                     | 5,348              |
| 59   | J STRUCT BIOL               | 54.16                         | 2.15                                   | 2.08                                     | 1.90                                     | 1,038              |
| 60   | J EXP MED                   | 53.69                         | 2.34                                   | 2.28                                     | 2.08                                     | 121                |

|    |                            |       |      |      |      |       |
|----|----------------------------|-------|------|------|------|-------|
| 61 | BIOCHEM BIOPHYS RES COMMUN | 53.40 | 2.18 | 2.11 | 1.92 | 976   |
| 62 | PLANT CELL                 | 53.01 | 2.21 | 2.17 | 2.05 | 138   |
| 63 | J STRUCT FUNCT GENOM       | 52.69 | 2.07 | 2.03 | 1.92 | 168   |
| 64 | J BACTERIOL                | 52.09 | 2.22 | 2.16 | 2.01 | 371   |
| 65 | J VIROL*                   | 51.02 | 2.34 | 2.26 | 2.06 | 957   |
| 66 | MABS                       | 50.71 | 2.35 | 2.29 | 2.14 | 115   |
| 67 | NUCLEIC ACIDS RES*         | 50.60 | 2.28 | 2.21 | 1.98 | 2,127 |
| 68 | PNAS*                      | 50.16 | 2.27 | 2.19 | 1.94 | 7,376 |
| 69 | MOL PHARMACOL              | 50.14 | 2.35 | 2.27 | 2.02 | 129   |
| 70 | J IMMUNOL                  | 50.07 | 2.26 | 2.19 | 2.02 | 296   |
| 71 | PROTEIN CELL               | 49.74 | 2.26 | 2.21 | 2.04 | 178   |
| 72 | PLOS BIOL*                 | 48.78 | 2.35 | 2.25 | 2.01 | 336   |
| 73 | RNA                        | 48.30 | 2.44 | 2.32 | 1.97 | 245   |
| 74 | BIOORG MED CHEM LETT*      | 48.16 | 2.19 | 2.16 | 2.05 | 1,590 |
| 75 | VIROLOGY                   | 47.40 | 2.44 | 2.37 | 2.18 | 126   |
| 76 | CELL REP*                  | 47.07 | 2.52 | 2.42 | 2.16 | 399   |
| 77 | EMBO REP                   | 47.02 | 2.35 | 2.28 | 2.09 | 211   |
| 78 | SCI ADV                    | 46.77 | 2.33 | 2.22 | 1.85 | 182   |
| 79 | ELIFE*                     | 46.16 | 2.41 | 2.30 | 2.03 | 869   |
| 80 | CELL RES*                  | 45.08 | 2.42 | 2.36 | 2.20 | 189   |
| 81 | GENES DEV*                 | 44.76 | 2.41 | 2.33 | 2.11 | 279   |
| 82 | EMBO J*                    | 44.45 | 2.37 | 2.30 | 2.10 | 1,910 |
| 83 | COMMUN BIOL*               | 44.39 | 2.39 | 2.31 | 2.00 | 104   |
| 84 | NAT STRUCT MOL BIOL*       | 44.31 | 2.40 | 2.31 | 2.07 | 2,915 |
| 85 | NEURON*                    | 43.47 | 2.63 | 2.41 | 2.08 | 149   |
| 86 | NATURE*                    | 43.42 | 2.52 | 2.42 | 2.12 | 3,060 |
| 87 | NAT IMMUNOL*               | 43.10 | 2.52 | 2.45 | 2.22 | 119   |
| 88 | IMMUNITY*                  | 42.95 | 2.44 | 2.37 | 2.18 | 265   |
| 89 | SCIENCE*                   | 42.78 | 2.50 | 2.39 | 2.10 | 1,949 |
| 90 | MOL CELL*                  | 42.05 | 2.45 | 2.37 | 2.14 | 1,599 |
| 91 | CELL*                      | 39.37 | 2.54 | 2.45 | 2.20 | 1,563 |

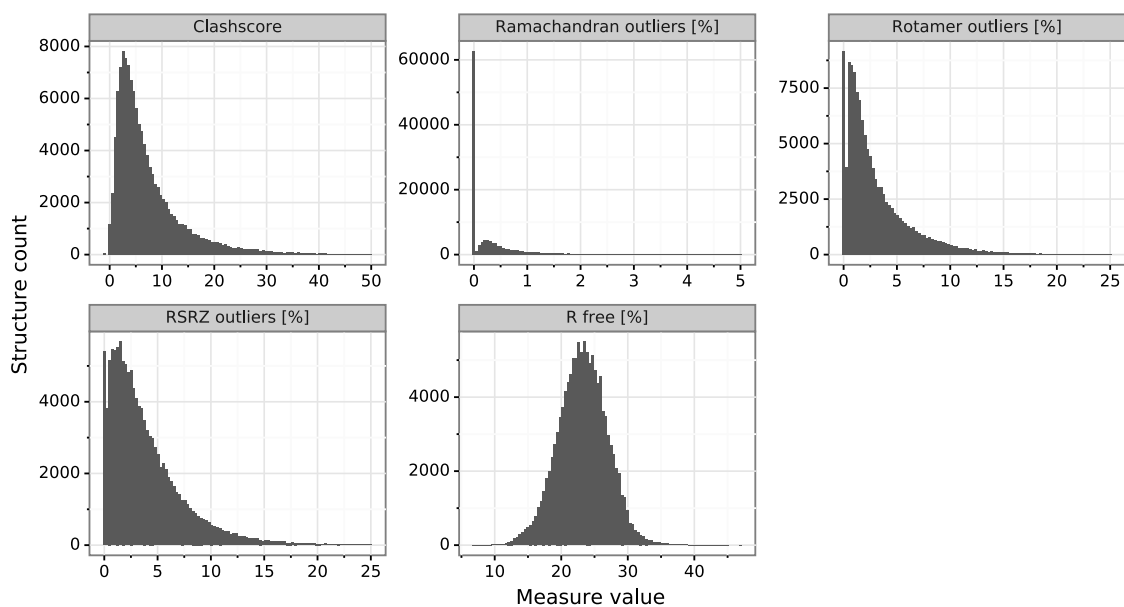

**Figure S1. Histograms of quality metric values of structures found in the PDB.** The histograms show the distribution of Clashscore, percent of Ramachandran outliers, percentage of rotamer outliers, percentage of RSRZ outliers and  $R_{\text{free}}$  values. The y-axis shows the number of depositions with a given metric value displayed on the x-axis.



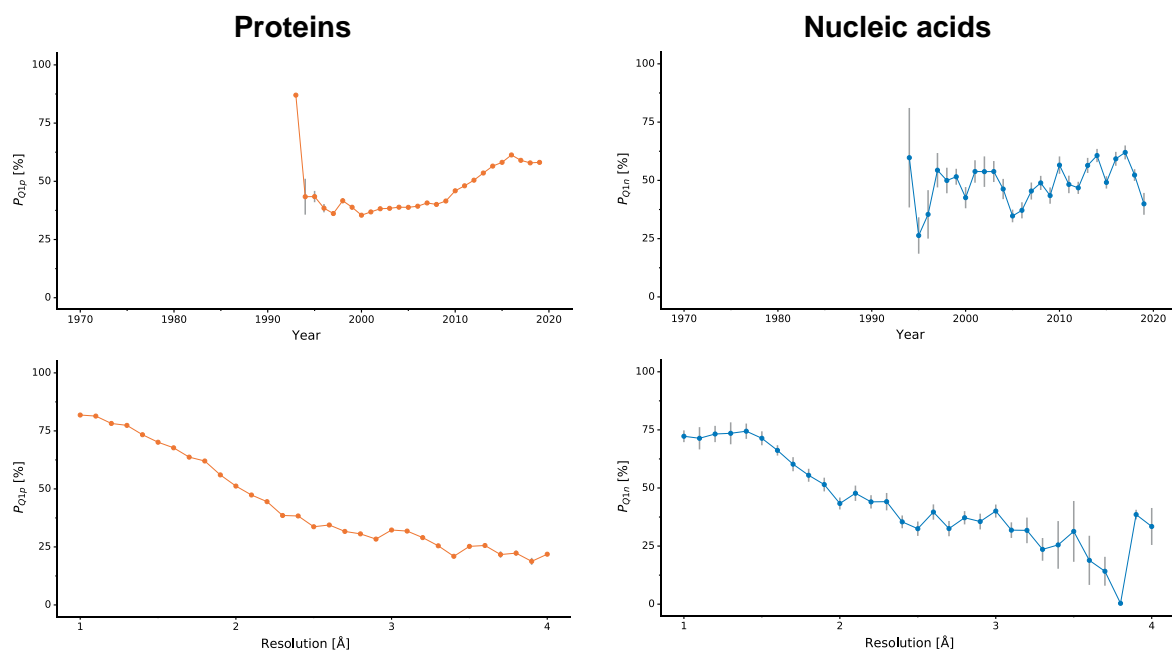

**Figure S2.  $P_{QI}$  analysis without imputed values.** Variation in the mean  $P_{QI}$  percentile (higher is better) for deposits with all quality metrics over time (top) and resolution (bottom) for proteins (left) and nucleic acids (right). Error bars indicate the estimated unbiased standard error of the mean.

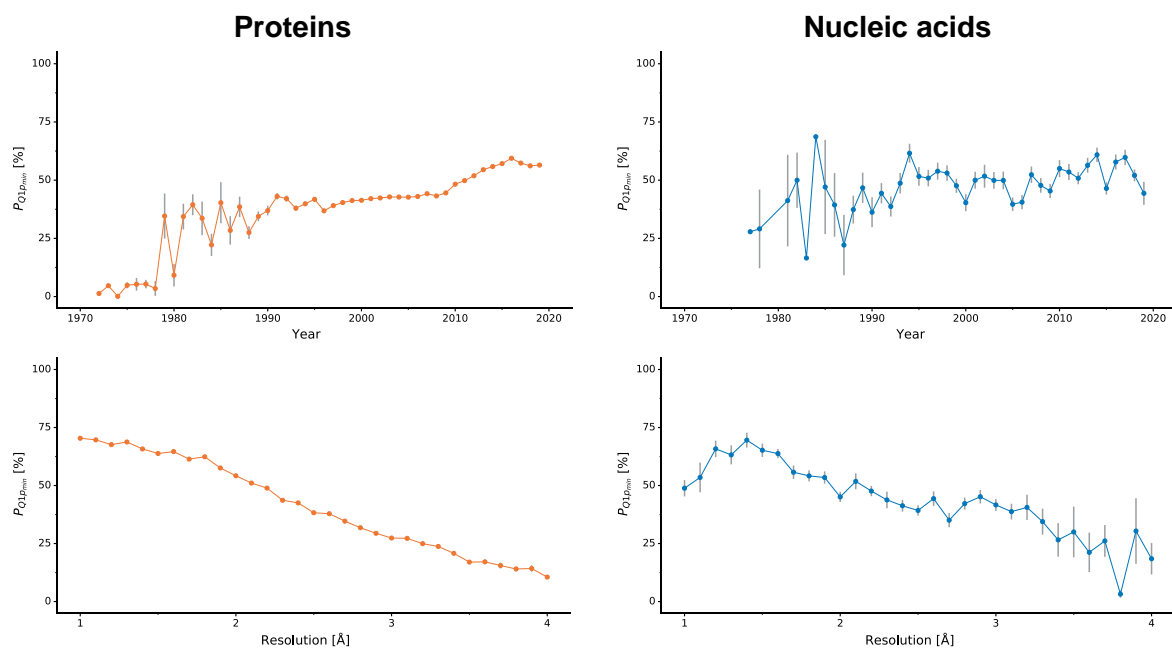

**Figure S3.  $P_{Q1min}$  analysis (minimum approach).** Variation in the mean  $P_{Q1min}$  percentile (higher is better) over time (top) and resolution (bottom) for proteins (left) and nucleic acids (right). Error bars indicate the estimated unbiased standard error of the mean.

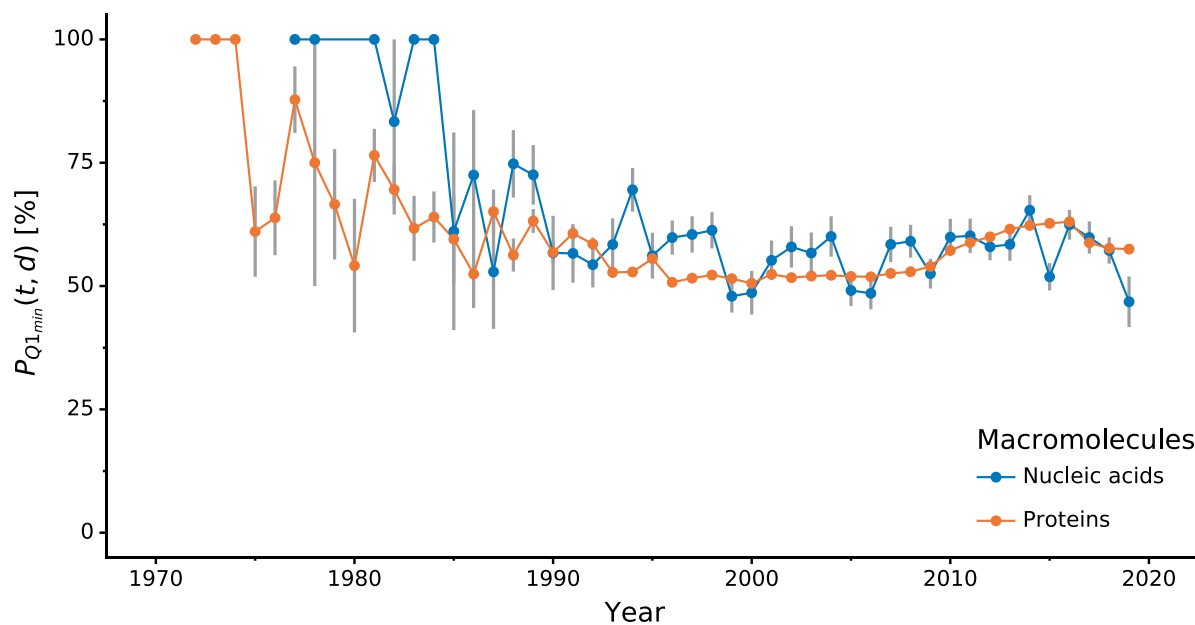

**Figure S4. Comparison of  $P_{Q1_{min}}(t, d)$  of protein and nucleic acid structures over time.** Variation in mean  $P_{Q1_{min}}(t, d)$  quality percentile (y-axis, higher is better), comparing nucleic acid and protein structures (color) over time (x-axis). Error bars indicate estimated unbiased standard errors of the mean.

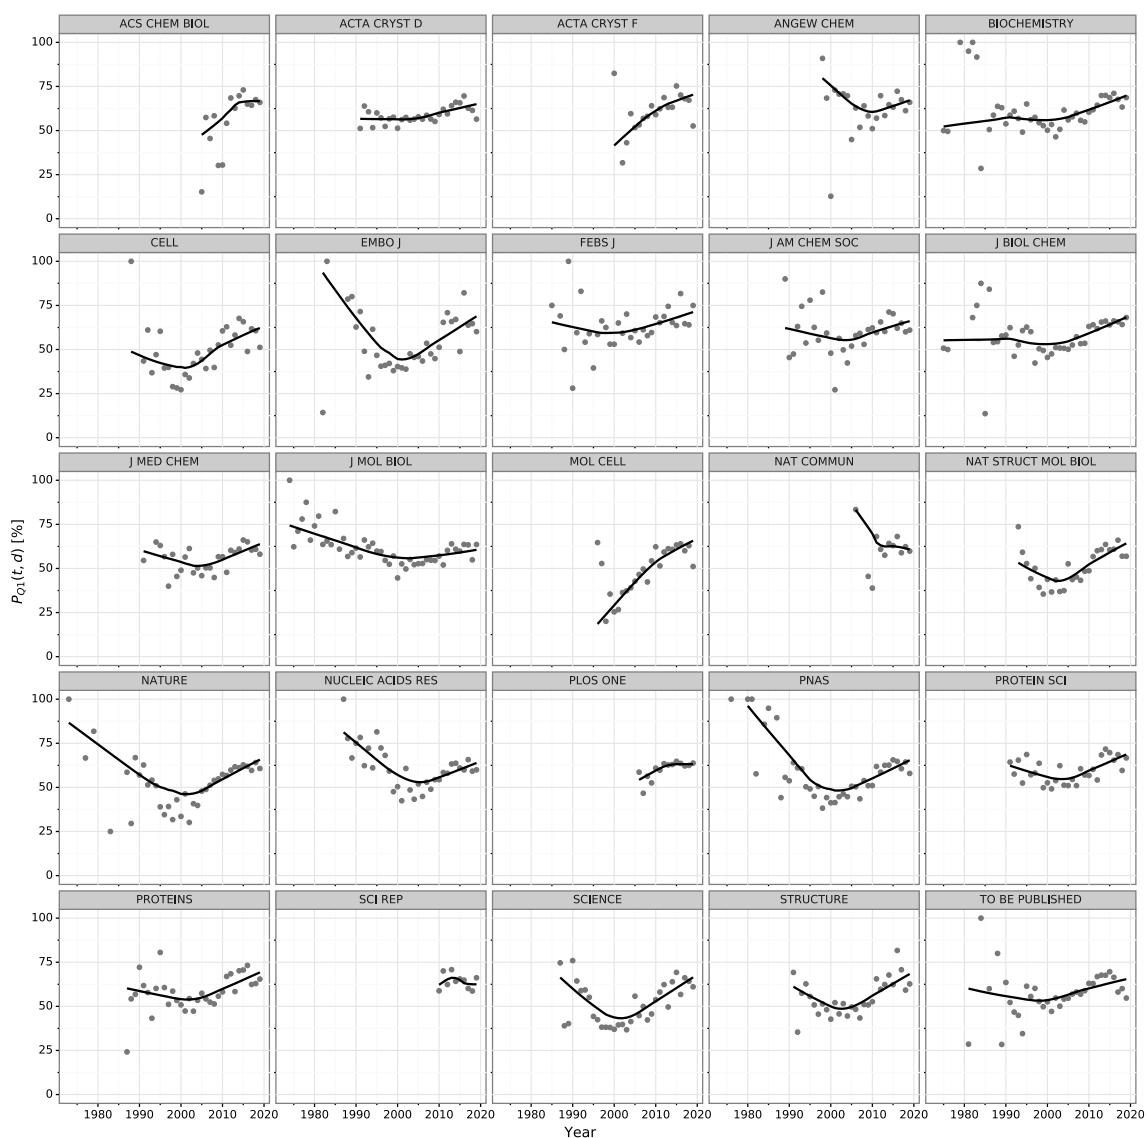

**Figure S5. Average  $P_{QI}(t,d)$  of popular journals for each year.** The plot shows yearly (x-axis) means of  $P_{QI}(t,d)$  values (y-axis) for each of the 25 most popular journals (panels). Regression lines computed using the locally estimated scatterplot smoothing (LOESS) method.

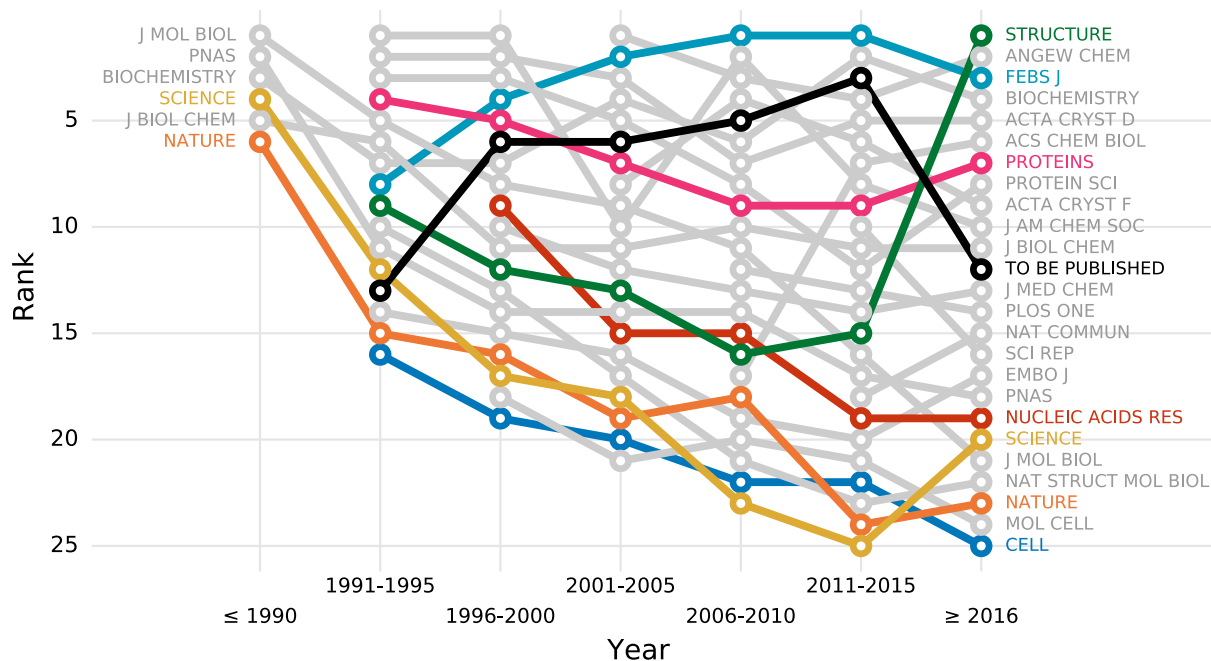

**Figure S6. Journal ranking over time according to  $P_{QI}(t)$ .** The plot shows the journal's rank (y-axis) in a given time period (x-axis). Only the 25 most popular journals with at least 30 deposits in a given period were plotted.

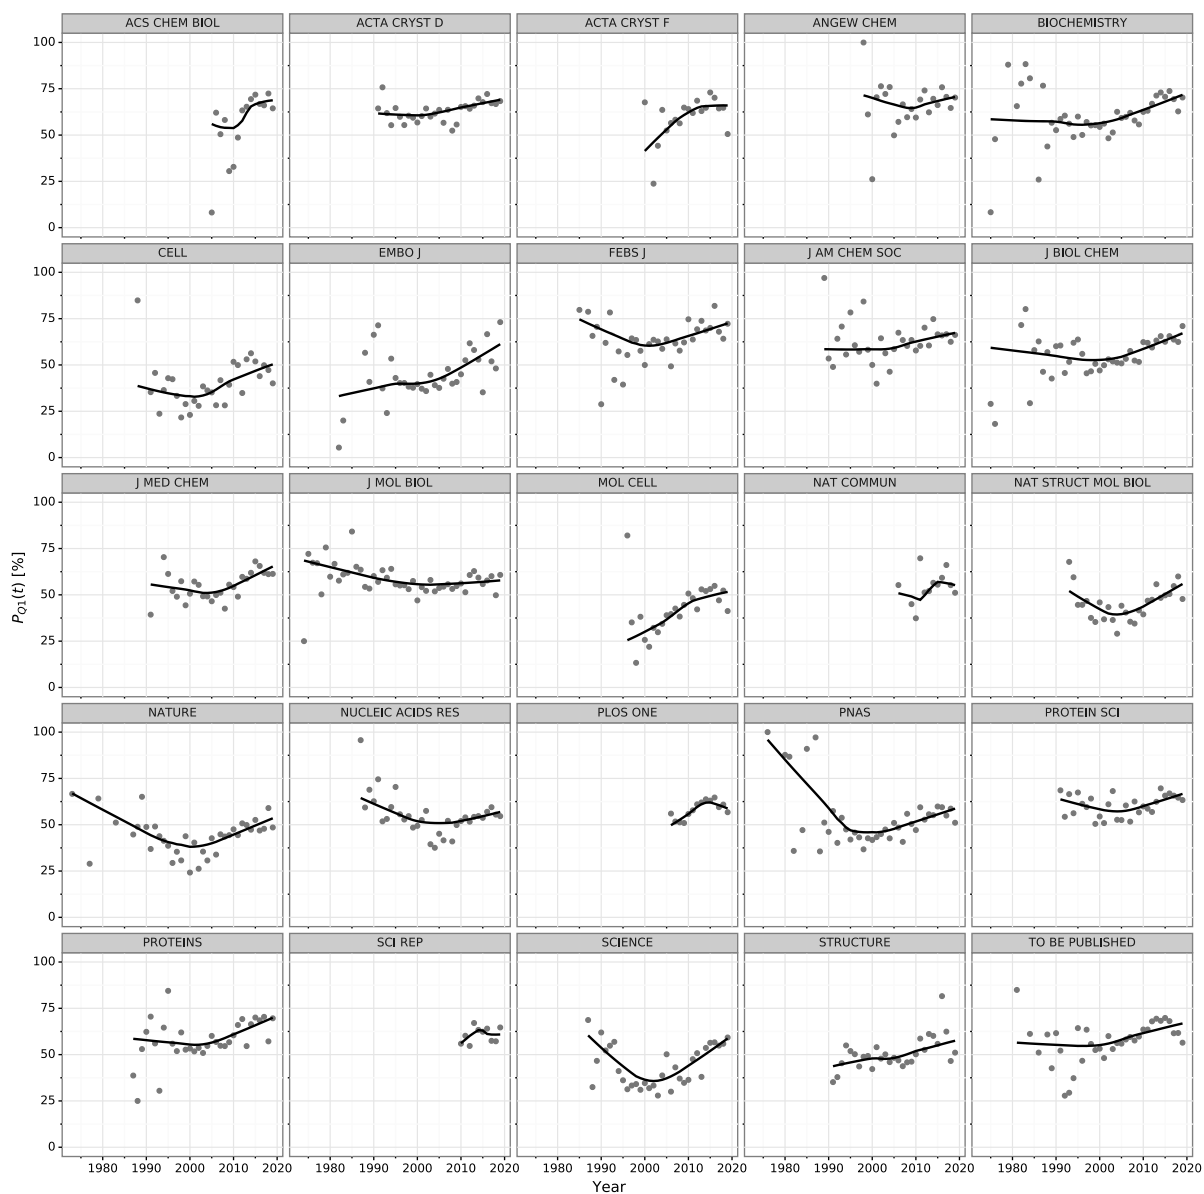

**Figure S7. Journal quality over time according to  $P_{QI}(t)$ .** The plot shows yearly (x-axis) means of  $P_{QI}(t)$  values (y-axis) for each of the 25 most popular journals (panels). Regression lines computed using the locally estimated scatterplot smoothing (LOESS) method.

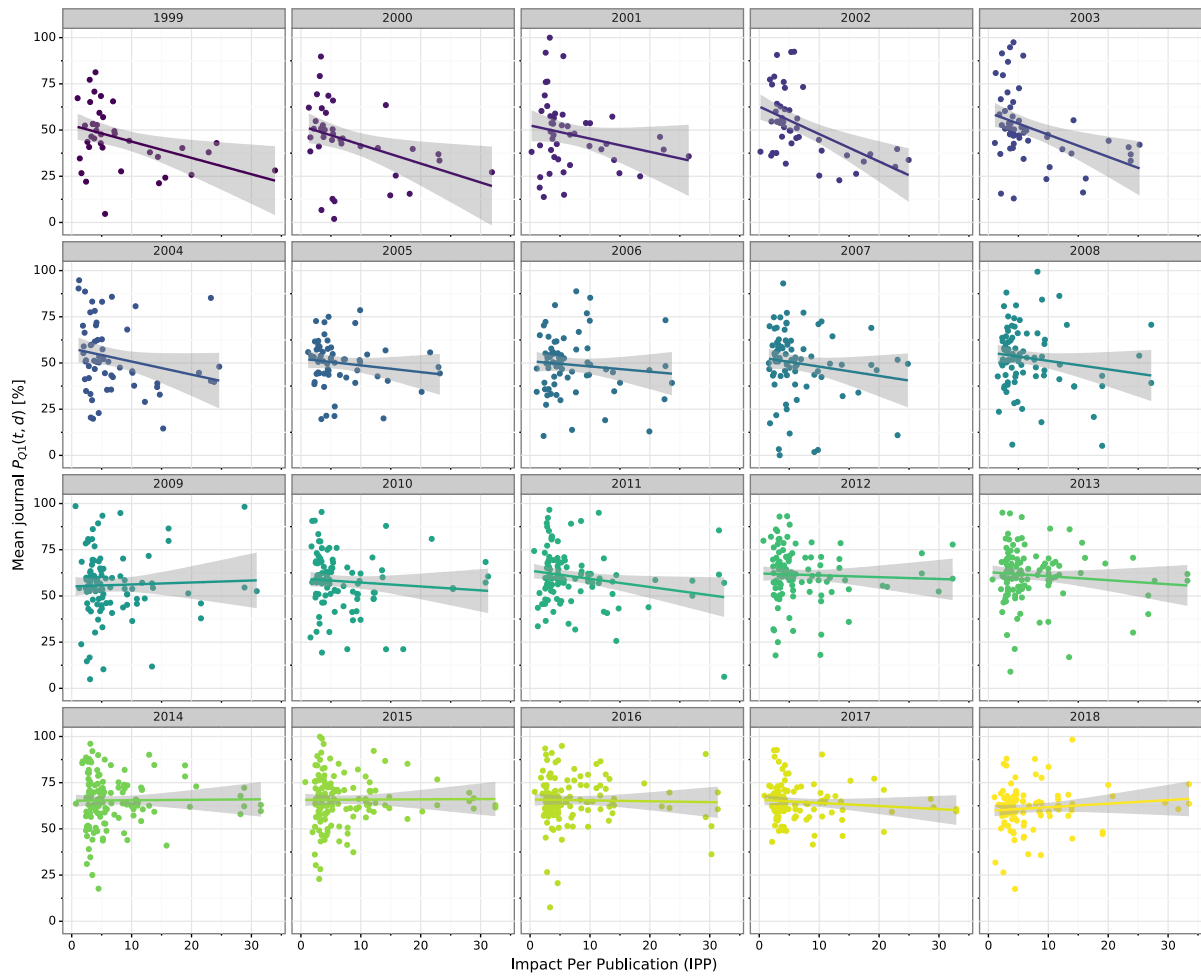

**Figure S8. Scatterplots of mean journal  $P_{Q1}(t, d)$  and the journal's impact.** Variation in mean journal  $P_{Q1}(t, d)$  (y-axis) in a given year (panel, color) plotted against the journals Impact Per Publication (IPP). IPP uses the same formula as the 3-year Impact Factor, but is based on publicly available Scopus data. The two regression lines show linear trends with 95% confidence intervals (gray areas).

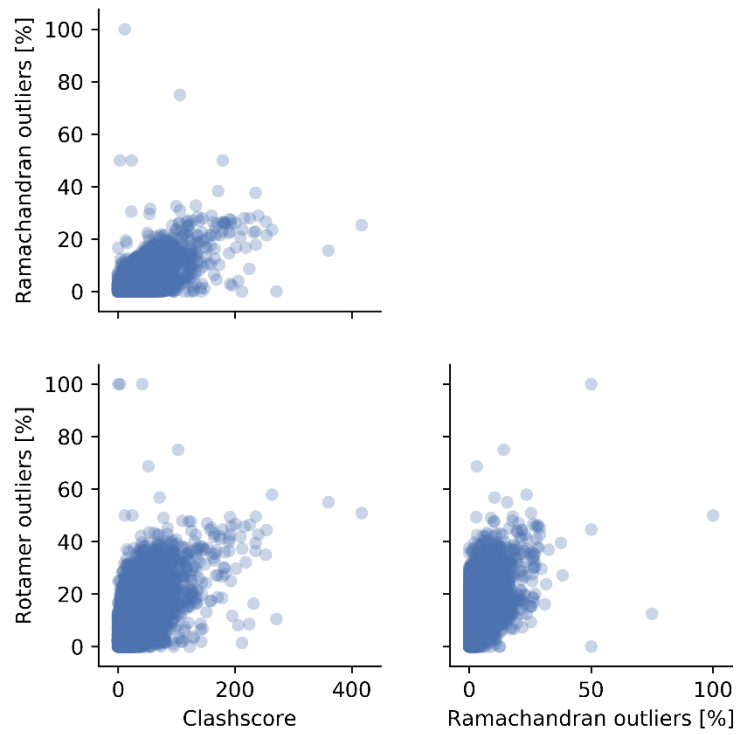

**Figure S9. Scatterplots of the values of Clashscore, Ramachandran outliers, and Rotamer outliers found in the PDB.** Each point represents a PDB deposit.
